# Supplementary material for: Fabrication of three dimensional CeO2 hierarchical structures: Precursor template synthesis, formation mechanism and properties
Source: Royal Society of Chemistry journal article supplement (doi:10.1039/c0ce00635a), 2011-01-01
Supplement: c0ce00635a.pdf [file c0ce00635a.pdf]

# **Fabrication of Three Dimensional CeO<sub>2</sub> Hierarchical Structures: Precursor Template Synthesis, Formation Mechanism and Properties**

*Jingjing Wei, Zhijie Yang, Yanzhao Yang\**

*Key Laboratory for Special Functional Aggregate Materials of Education Ministry,  
School of Chemistry and Chemical Engineering, Shandong University, Jinan 250100,  
P. R. China.*

---

\* Corresponding author: E-mail: [yzhyang@sdu.edu.cn](mailto:yzhyang@sdu.edu.cn).

### Characterization:

The crystallinity of the products was characterized using a high resolution transmission electron microscope (HRTEM, JEM-2100) with an accelerating voltage of 200 kV.

### Figures

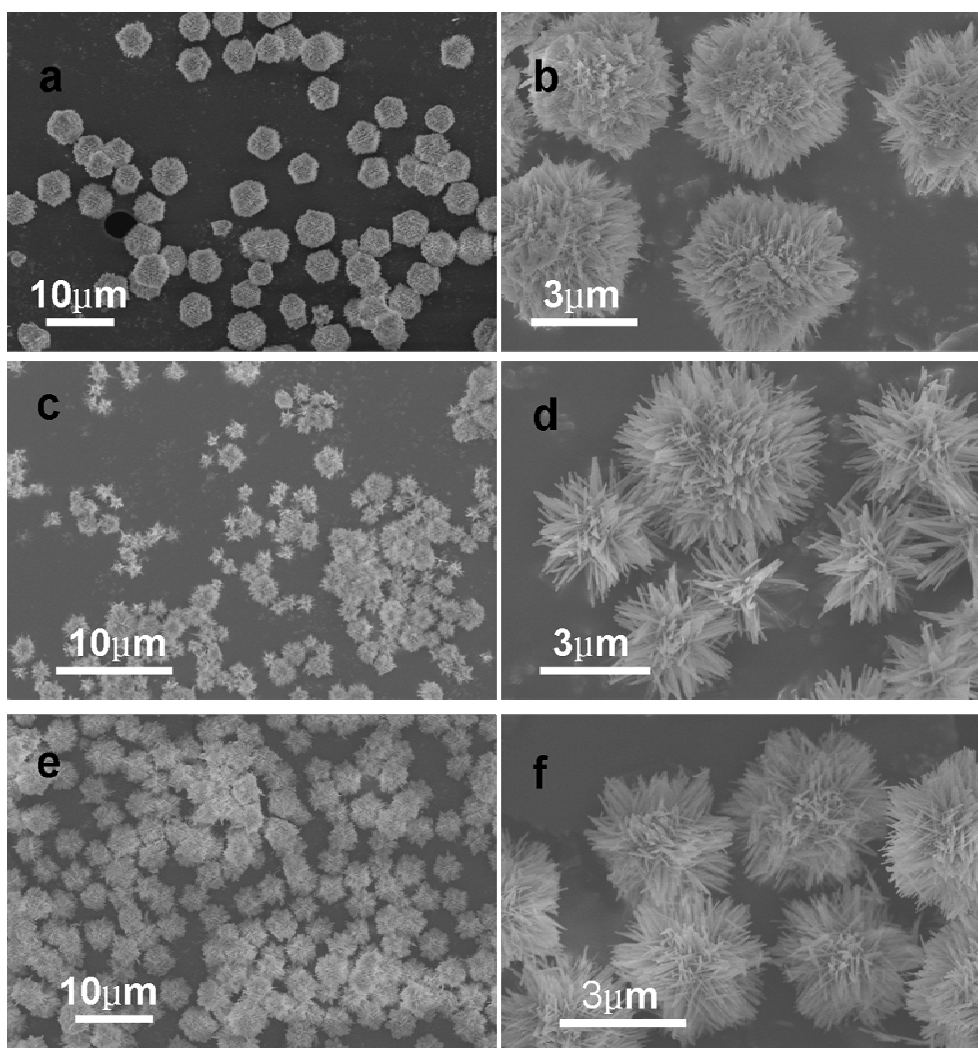

**Fig. S1** SEM images of the Ce(HCOO)<sub>3</sub> urchin-like structures obtained at 150 °C for different reaction times: (a,b) 10 min; (c,d) 30 min; (e,f) 60 min.

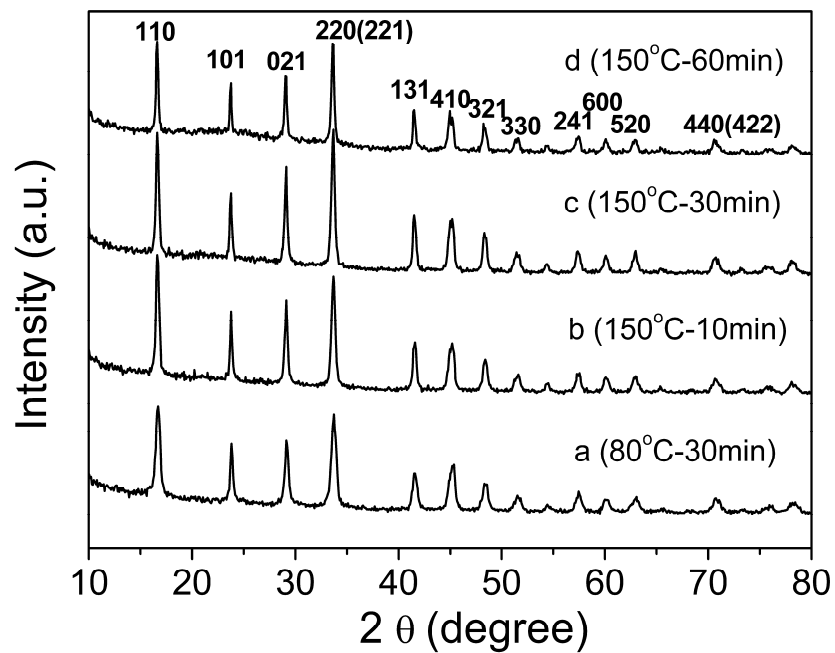

**Fig. S2** XRD patterns of the precursors obtained under different reaction conditions:  
(a) 80 °C for 30 min; (b) 150 °C for 10 min; (c) 150 °C for 30 min; (d) 150 °C for 60 min.

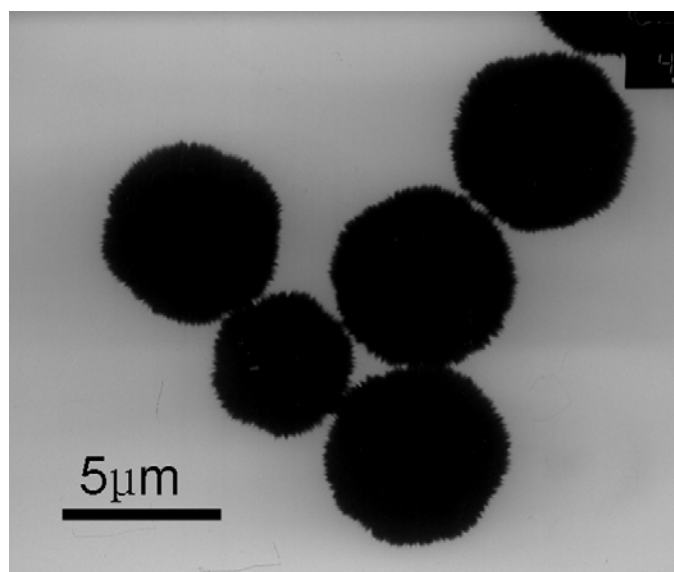

**Fig. S3** TEM image of the precursors obtained in the absence of PVP

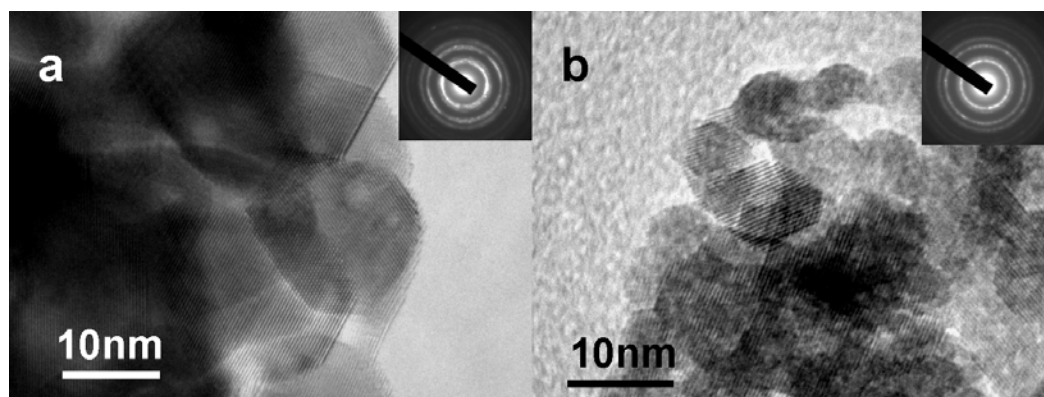

**Fig. S4** HRTEM images of the as-obtained CeO<sub>2</sub> hierarchical structures: (a) urchin-like and (b) coral-like structures. Inset is the corresponding SAED patterns.

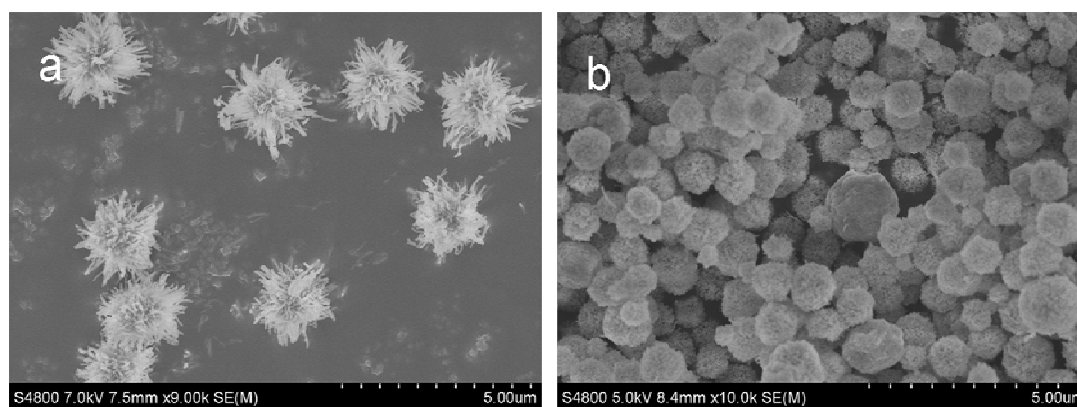

**Fig. S5** SEM images of the CeO<sub>2</sub> hierarchical structures after catalytic measurement: (a) urchin-like; (b) coral-like structure.
